# Supplementary material for: The Synthetic Plasmodium falciparum Circumsporozoite Peptide PfCS102 as a Malaria Vaccine Candidate: A Randomized Controlled Phase I Trial
Source: PubMed Central journal article supplement (PMC2749339; doi:10.1371/journal.pone.0007304), 2009-10-02
Supplement: pone.0007304.s001.pdf [file pone.0007304.s001.pdf]

CONSORT Statement 2001 - Checklist   
 Items to include when reporting a randomized trial

| <i>PAPER SECTION<br/>And topic</i>         | <b>Item</b> | <b>Descriptor</b>                                                                                                                                                                                                                                                                                                                                           | <b>Reported on<br/>Paper Sections</b>                                                                                                       |
|--------------------------------------------|-------------|-------------------------------------------------------------------------------------------------------------------------------------------------------------------------------------------------------------------------------------------------------------------------------------------------------------------------------------------------------------|---------------------------------------------------------------------------------------------------------------------------------------------|
| <i>TITLE &amp; ABSTRACT</i>                | 1           | <u>How participants were allocated to interventions</u> (e.g., "random allocation", "randomized", or "randomly assigned").                                                                                                                                                                                                                                  | <i>ABSTRACT</i>                                                                                                                             |
| <i>INTRODUCTION</i><br>Background          | 2           | <u>Scientific background and explanation of rationale.</u>                                                                                                                                                                                                                                                                                                  | <i>INTRODUCTION</i><br>Background                                                                                                           |
| <i>METHODS</i><br>Participants             | 3           | <u>Eligibility criteria for participants</u> and the <u>settings and locations where the data were collected.</u>                                                                                                                                                                                                                                           | <i>METHODS</i><br>Participants                                                                                                              |
| Interventions                              | 4           | <u>Precise details of the interventions intended for each group and how and when they were actually administered.</u>                                                                                                                                                                                                                                       | <i>METHODS</i><br>Interventions:<br>Vaccine preparation<br>Phase 1 study design<br>Assessment of safety and tolerability                    |
| Objectives                                 | 5           | <u>Specific objectives and hypotheses.</u>                                                                                                                                                                                                                                                                                                                  | <i>METHODS</i><br>Objectives                                                                                                                |
| Outcomes                                   | 6           | <u>Clearly defined primary and secondary outcome measures</u> and, when applicable, any <u>methods used to enhance the quality of measurements</u> (e.g., multiple observations, training of assessors).                                                                                                                                                    | <i>METHODS</i><br>Peptides<br>Antibody responses<br>T cell prolif and cytokines<br>CD8+T cell detection<br>Intracellular. Cytokine staining |
| Sample size                                | 7           | <u>How sample size was determined</u> and, when applicable, <u>explanation of any interim analyses and stopping rules.</u>                                                                                                                                                                                                                                  | <i>METHODS</i><br>Sample size                                                                                                               |
| Randomization --<br>Sequence generation    | 8           | <u>Method used to generate the random allocation sequence, including details of any restrictions</u> (e.g., blocking, stratification)                                                                                                                                                                                                                       | <i>METHODS</i><br>Randomization                                                                                                             |
| Randomization --<br>Allocation concealment | 9           | <u>Method used to implement the random allocation sequence</u> (e.g., numbered containers or central telephone), clarifying whether the sequence was concealed until interventions were assigned.                                                                                                                                                           | <i>METHODS</i><br>Randomization                                                                                                             |
| Randomization --<br>Implementation         | 10          | <u>Who generated the allocation sequence, who enrolled participants, and who assigned participants to their groups.</u>                                                                                                                                                                                                                                     | <i>METHODS</i><br>Randomization                                                                                                             |
| Blinding (masking)                         | 11          | <u>Whether or not participants, those administering the interventions, and those assessing the outcomes were blinded to group assignment.</u> If done, <u>how the success of blinding was evaluated.</u>                                                                                                                                                    | <i>METHODS</i><br>Blinding                                                                                                                  |
| Statistical methods                        | 12          | <u>Statistical methods used to compare groups for primary outcome(s); Methods for additional analyses,</u> such as subgroup analyses and adjusted analyses.                                                                                                                                                                                                 | <i>METHODS</i><br>Statistical evaluation                                                                                                    |
| <i>RESULTS</i><br>Participant flow         | 13          | <u>Flow of participants through each stage</u> (a diagram is strongly recommended). Specifically, for each group report the numbers of participants randomly assigned, receiving intended treatment, completing the study protocol, and analyzed for the primary outcome. <u>Describe protocol deviations from study as planned, together with reasons.</u> | <i>RESULTS</i><br>Participant flow                                                                                                          |
| Recruitment                                | 14          | <u>Dates defining the periods of recruitment and follow-up.</u>                                                                                                                                                                                                                                                                                             | <i>RESULTS</i><br>Participant flow                                                                                                          |
| Baseline data                              | 15          | <u>Baseline demographic and clinical characteristics of each group.</u>                                                                                                                                                                                                                                                                                     | <i>RESULTS</i><br>Baseline data                                                                                                             |
| Numbers analyzed                           | 16          | <u>Number of participants (denominator) in each group included in each analysis and whether the analysis was by "intention-to-treat".</u> State the results in absolute numbers when feasible (e.g., 10/20, not 50%).                                                                                                                                       | <i>RESULTS</i><br>Participant flow                                                                                                          |
| Outcomes and estimation                    | 17          | <u>For each primary and secondary outcome, a summary of results for each group, and the estimated</u>                                                                                                                                                                                                                                                       | <i>RESULTS</i><br>Anti-PfCS102 antibody                                                                                                     |

|                                     |    |                                                                                                                                                                                              |                                                                                                                    |
|-------------------------------------|----|----------------------------------------------------------------------------------------------------------------------------------------------------------------------------------------------|--------------------------------------------------------------------------------------------------------------------|
|                                     |    | <u>effect size and its precision</u> (e.g., 95% confidence interval).                                                                                                                        | responses<br>Anti-spz responses<br>T cell proliferation<br>Interferon $\gamma$<br>IL-10<br>CD4+ and CD8+ responses |
| Ancillary analyses                  | 18 | <u>Address multiplicity by reporting any other analyses performed</u> , including subgroup analyses and adjusted analyses, indicating those pre-specified and those exploratory.             | None                                                                                                               |
| Adverse events                      | 19 | <u>All important adverse events or side effects in each intervention group.</u>                                                                                                              | RESULTS<br>Assessment of safety and tolerability                                                                   |
| <i>DISCUSSION</i><br>Interpretation | 20 | <u>Interpretation of the results</u> , taking into account study hypotheses, sources of potential bias or imprecision and the dangers associated with multiplicity of analyses and outcomes. | <i>DISCUSSION</i><br>interpretation                                                                                |
| Generalizability                    | 21 | <u>Generalizability (external validity) of the trial findings.</u>                                                                                                                           | <i>DISCUSSION</i><br>Generalizability                                                                              |
| Overall evidence                    | 22 | <u>General interpretation of the results in the context of current evidence.</u>                                                                                                             | <i>DISCUSSION</i><br>Overall evidence                                                                              |

[www.consort-statement.org](http://www.consort-statement.org)
