# Supplementary material for: The Synthetic Plasmodium falciparum Circumsporozoite Peptide PfCS102 as a Malaria Vaccine Candidate: A Randomized Controlled Phase I Trial
Source: PubMed Central journal article supplement (PMC2749339; doi:10.1371/journal.pone.0007304), 2009-10-02
Supplement: pone.0007304.s003.pdf [file pone.0007304.s003.pdf]

**FACULTE DE MEDECINE**

COMMISSION D'ETHIQUE  
DE LA RECHERCHE CLINIQUE  
RUE DU BUGNON 21-CH-1005 LAUSANNE

PROF. M. BURNIER  
PRESIDENT

SECRETARIAT CENTRAL  
TEL. +41 21 692 50 08  
FAX +41 21 692 50 05

SOUS-COMMISSION I  
PRESIDENT PROF. M. BURNIER  
TEL : +41 21 345 20 96

SOUS-COMMISSION II  
PRESIDENT DR F. GOMEZ, PD, MER  
TEL : +41 21 314 05 96

SOUS-COMMISSION III (PSYCHIATRIE)  
PRESIDENT DR J. GASSER, PD, MER  
TEL : +41 21 643 64 65

Prof. F. Spertini  
Professeur associé  
Service d'immunologie et  
d'allergie  
CHUV  
1011 Lausanne

Lausanne, le 24 octobre 2002

---

## Avis de la Commission d'Ethique de la recherche clinique

---

Monsieur et cher Collègue,

Lors de sa séance du **9 septembre 2002**, la Commission d'Ethique de la recherche clinique, Sous-Commission I (dans la composition détaillée en page 4) a procédé à une évaluation approfondie du projet de recherche désigné ci-après :

**Protocole 162/02** : Etude clinique de phase I, sur la tolérance et l'immunogénicité d'un long peptide synthétique (282-383 ou P/CS 102) dérivé de la protéine circumsporozoaire du *Plasmodium falciparum* comme candidat en tant que vaccin antipaludique

**Investigateur :**

Prof. F. Spertini  
Professeur associé  
Service d'immunologie et  
d'allergie  
CHUV  
1011 Lausanne

La Commission d'Ethique de la recherche clinique, Sous-Commission I, base son appréciation sur les documents soumis les 26.08.2002 et 16.10.2002, soit :

- Brochure de l'investigateur, version en anglais No 1 du 27.08.2002
- Protocole en français, version finale du 26.08.2002 (corrigée le 18 octobre 2002)
- Formulaire d'information et de consentement éclairé et écrit, version finale du 28.08.02
- Formulaire de recueil de Consentement éclairé, à signer par le sujet volontaire du 28.08.02, corrigé le 18.10.2002
- Attestation d'assurance du 15.08.2002
- Curriculum vitae
- Mode de rémunération du 27.08.2002
- Affichette
- Cahier d'observations (recueil des données) des sujets de recherche
- Journal (carnet de Bord) des sujets de recherche modifié
- Votre lettre du 16.10.2002

procédure ordinaire       procédure simplifiée       évaluation ultérieure

La Commission d'Ethique arrête l'avis suivant :

- A Avis positif**
- B Avis positif assorti de recommandations** (v. page 3 et suiv.)
- Information écrite à la Commission d'éthique suffisante
- C Avis conditionnel** (v. page 3 et suiv.)
- Evaluation ultérieure par la Commission d'éthique nécessaire
- Information écrite à la Commission d'éthique suffisante
- D Avis négatif motivé (et explication pour réexamen)** (v. page 3 et suiv.)
- E Avis justifié de ne pas entrer en matière** (v. page 3 et suiv.)

L'avis s'applique également aux autres investigateurs mentionnés dans la demande d'évaluation, travaillant dans des sites de recherche relevant du champ de compétence de la Commission d'Ethique de la recherche clinique.

**Pour mémoire : Obligations de l'investigateur**

- Les produits testés et de comparaison (médicaments et dispositifs médicaux) doivent être fabriqués, évalués et utilisés conformément aux règles de l'art visant à en garantir la qualité et la sécurité.
- Devoir de signaler: a) immédiatement tout événement indésirable grave (serious adverse events)
  - b) toute information devenant disponible au cours de l'essai et ayant des conséquences directes pour la sécurité des sujets et la poursuite de l'essai
  - c) Modification du protocole
  - d) Fin ou arrêt prématuré de l'essai
- Rapport intermédiaire: une fois par année
- Obligation de notifier les essais ou de demander l'autorisation correspondante auprès de Swissmedic ou d'autres autorités fédérales ou cantonales (en cas d'étude sponsorisée, cette tâche incombe au promoteur)
- Rapport final

**Emolument :** Fr. 800.--

**La Commission d'éthique, Sous-Commission I :**

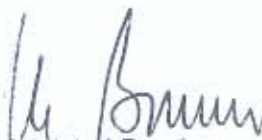  
 Prof. Michel Burnier  
 Président

**FORMULAIRE DE RAPPORT INTERMEDIAIRE/FINAL**  
**pour la Commission d'éthique de la recherche clinique**  
**Sous-Commission I**

Investigateur :

Prof. F. Spertini  
 Professeur associé  
 Service d'immunologie et  
 d'allergie  
 CHUV

**Protocole 162/02 :** Etude clinique de phase I, sur la tolérance et l'immunogénicité d'un long peptide synthétique (282-383 ou P/CS 102) dérivé de la protéine circumsporozoaire du *Plasmodium falciparum* comme candidat en tant que vaccin antipaludique

**Etude terminée:** OUI  NON       **Etude en cours:** OUI  NON

**Etude arrêtée:** OUI  NON

Si OUI, pourquoi?

.....  
 .....  
 .....

**Conclusions qui peuvent être tirées de l'étude à ce stade:**

.....  
 .....  
 .....  
 .....

**Y a-t-il eu des incidents pendant l'étude?** OUI  NON

Si OUI, lesquels?

.....  
 .....  
 .....

**Fin de l'étude prévue pour:** .....

**A retourner au:** Prof. M. Burnier  
 Président de la Commission d'Ethique de la Recherche clinique de la Faculté de  
 Médecine  
 Rue du Bugnon 21, 1005 Lausanne

En cas de publication, prière d'adresser un tiré-à-part.

**Date de l'acceptation de l'étude par la Commission d'Ethique:**

24.10.2002

**Date limite pour le renvoi de ce formulaire:**

24.10.2003

## Séance du 9 septembre 2002

### Composition de la Commission d'éthique de la recherche clinique, Sous-Commission I

L'avis de la Commission d'éthique ayant siégé dans sa composition détaillée ci-après est valable, le quorum étant atteint (art. 32 de l'Ordonnance sur les essais cliniques de produits thérapeutiques du 17 octobre 2001).

|                   | Nom, prénom                   | Profession, titre           | H                                   | F                                   | participe à l'avis                  |                                     |
|-------------------|-------------------------------|-----------------------------|-------------------------------------|-------------------------------------|-------------------------------------|-------------------------------------|
|                   |                               |                             |                                     |                                     | oui                                 | non                                 |
| <b>Présidence</b> | Burnier Michel                | Professeur associé          | <input checked="" type="checkbox"/> | <input type="checkbox"/>            | <input checked="" type="checkbox"/> | <input type="checkbox"/>            |
| <b>Membres</b>    | Baudraz Marie-Claire          | Médecin installé, spéc. FMH | <input type="checkbox"/>            | <input checked="" type="checkbox"/> | <input checked="" type="checkbox"/> | <input type="checkbox"/>            |
|                   | Boillat Marcel-André          | Professeur ordinaire        | <input checked="" type="checkbox"/> | <input type="checkbox"/>            | <input checked="" type="checkbox"/> | <input type="checkbox"/>            |
|                   | Foppa Carlo                   | Docteur, PhD, Ethicien      | <input checked="" type="checkbox"/> | <input type="checkbox"/>            | <input checked="" type="checkbox"/> | <input type="checkbox"/>            |
|                   | Gailloud Claude               | Professeur honoraire        | <input checked="" type="checkbox"/> | <input type="checkbox"/>            | <input checked="" type="checkbox"/> | <input type="checkbox"/>            |
|                   | Gardaz Jean-Patrice           | Docteur, PD, MER            | <input checked="" type="checkbox"/> | <input type="checkbox"/>            | <input checked="" type="checkbox"/> | <input type="checkbox"/>            |
|                   | Lejeune Ferdy                 | Professeur ordinaire        | <input checked="" type="checkbox"/> | <input type="checkbox"/>            | <input checked="" type="checkbox"/> | <input type="checkbox"/>            |
|                   | Joye Charles                  | Avocat                      | <input checked="" type="checkbox"/> | <input type="checkbox"/>            | <input checked="" type="checkbox"/> | <input type="checkbox"/>            |
|                   | Pannatier André               | Professeur en pharmacie     | <input checked="" type="checkbox"/> | <input type="checkbox"/>            | <input type="checkbox"/>            | <input checked="" type="checkbox"/> |
|                   | Reymond Catherine             | Infirmière HMP              | <input type="checkbox"/>            | <input checked="" type="checkbox"/> | <input checked="" type="checkbox"/> | <input type="checkbox"/>            |
|                   | Rossel Martine                | Infirmière enseignante      | <input type="checkbox"/>            | <input checked="" type="checkbox"/> | <input checked="" type="checkbox"/> | <input type="checkbox"/>            |
|                   | Membre compétent en biométrie | Burnand Bernard             | Docteur, PD, MER                    | <input checked="" type="checkbox"/> | <input type="checkbox"/>            | <input type="checkbox"/>            |
