# Supplementary material for: The Synthetic Plasmodium falciparum Circumsporozoite Peptide PfCS102 as a Malaria Vaccine Candidate: A Randomized Controlled Phase I Trial
Source: PubMed Central journal article supplement (PMC2749339; doi:10.1371/journal.pone.0007304), 2009-10-02
Supplement: pone.0007304.s004.pdf [file pone.0007304.s004.pdf]

## Confirmation de notification pour les essais cliniques de médicaments

(à remplir par le promoteur)

- |                                                                                       |                                                                                                                                                                                                                                                |
|---------------------------------------------------------------------------------------|------------------------------------------------------------------------------------------------------------------------------------------------------------------------------------------------------------------------------------------------|
| 1. Promoteur / adresse                                                                | RMF Dictagene SA - Chemin de la Vulliette 4 - 100 Lausanne 25                                                                                                                                                                                  |
| 1a. Personne en Suisse désignée au sens de l'art. 7 de l'Ordonnance (Oclin) / adresse | Winterthur Assurances<br>Ru Benjamin-Constant 1 - 1200 Lausanne                                                                                                                                                                                |
| 1b. Organisme de recherche (CRO)                                                      | MedPass International                                                                                                                                                                                                                          |
| 2. Investigateur responsable / adresse                                                | Dr. F. Spertini - Serv. d'Immunologie et d'Allergie - CHUV -<br>Rue du Bugnon - 1011 Lausanne                                                                                                                                                  |
| 2a. Autres investigateurs responsables, liste mise à jour (datée)                     | Voir Liste annexe.                                                                                                                                                                                                                             |
| 3. Essai clinique / titre / N° du protocole                                           | Etude clinique de phase I, sur la tolérance et l'immunogénicité d'un long peptide synthétique (282-383 ou PfCS102) dérivé de la protéine circumsporozoaire du Plasmodium falciparum, comme candidat en tant que vaccin anti-paludique. [DG001] |
| 4. Médicament d'essai                                                                 | PfCS102                                                                                                                                                                                                                                        |

A laisser en blanc!

Numéro de référence de l'essai clinique:

2002 DR 1 2 2 7

Il est confirmé que l'essai clinique décrit a été enregistré à l'Institut suisse des produits thérapeutiques. L'essai clinique peut commencer dès réception de cette confirmation de notification (art. 15, al. 2 de l'Ordonnance sur les essais cliniques de produits thérapeutiques, Oclin du 17.10.2001).

 swissmedic

Schweizerisches Heilmittelinstitut  
Institut suisse des produits thérapeutiques  
Istituto svizzero per gli agenti terapeutici  
Swiss Agency for Therapeutic Products

2002 DR 1 2 2 7

**SWISSmedic**

**Formulaire de notification  
pour les essais cliniques de médicaments**

Berne, 24 OCT. 2002

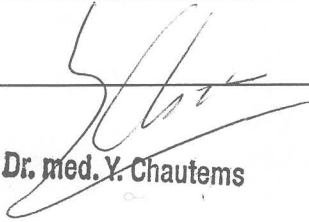

**Dr. med. Y. Chautems**
